# Supplementary material for: Investigation of Plasma-Derived Lipidome Profiles in Experimental Cerebral Malaria in a Mouse Model Study
Source: MDPI journal article supplement (doi:10.3390/ijms24010501), 2022-12-28
Supplement: s1 [file s1]

Before Normalisation

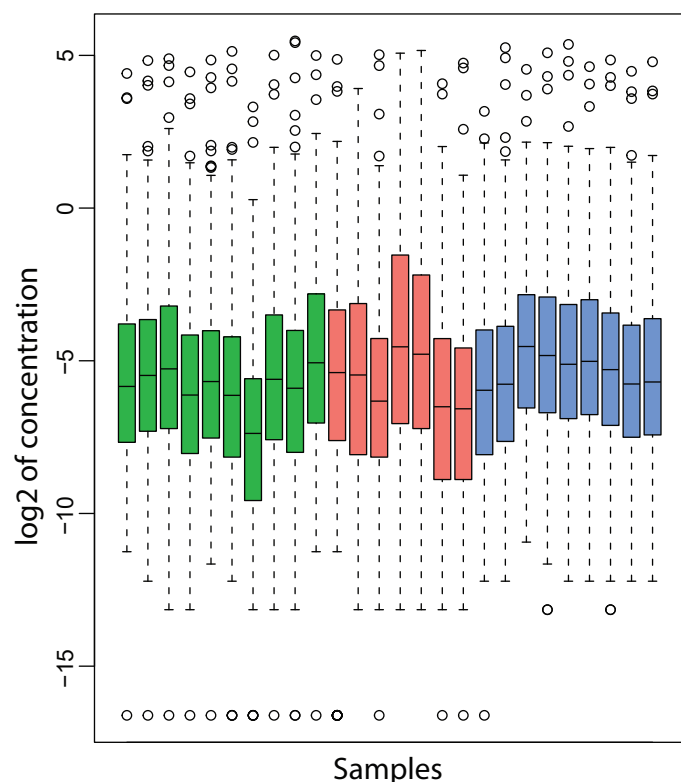

After Normalisation

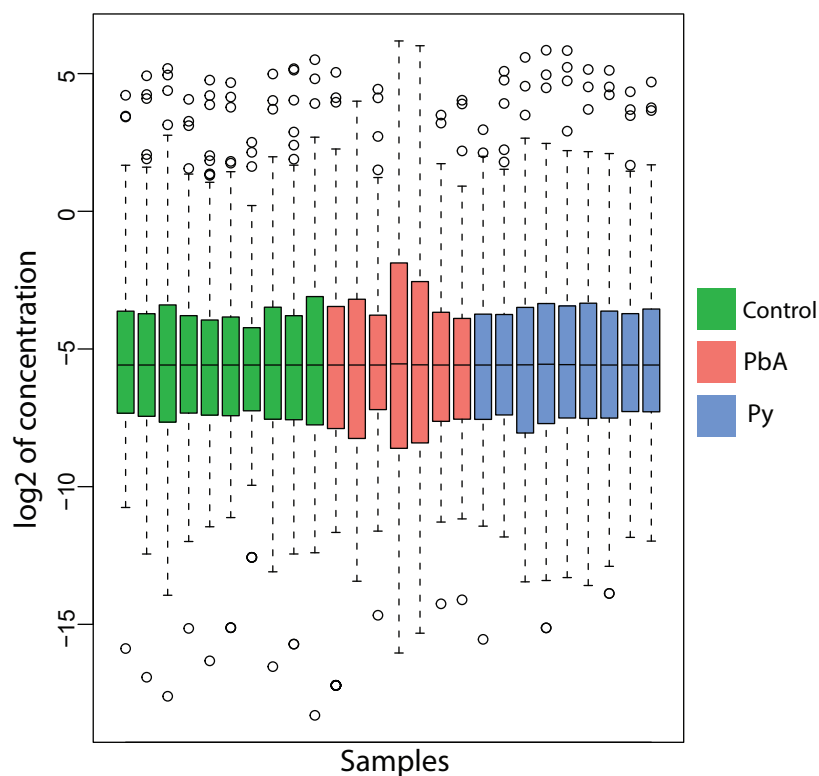

**Supplementary Figure S1. Boxplots of samples before and after median normalisation.** Each graph represents the minimum, maximum, median, first quartile and third quartile in the data set. Circles are outliers. An outlier is defined as a data point that is located outside 1.5 times the interquartile range above the upper quartile and below the lower quartile

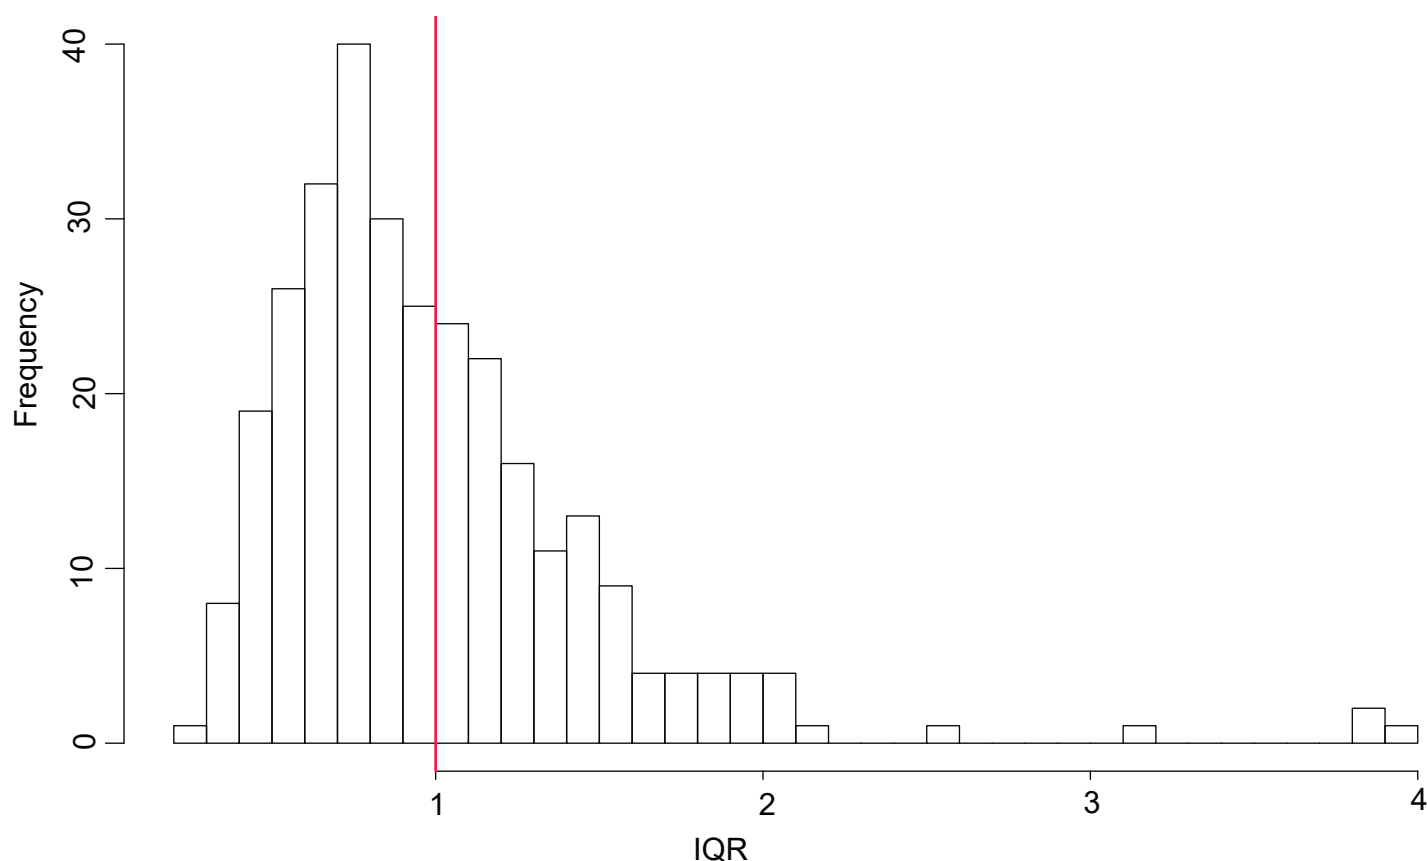

**Supplementary Figure S2. Histogram of Interquartile range (IQR) representing variability of lipids across samples.** Lipids with  $IQR \leq 1$  (red line) were considered as invariant and removed for further analysis
